# Supplementary material
Source: PubMed Central journal article supplement (PMC5728372)

# Supplementary Figure S1

## Cancer cell fractions tumor tissue

## Variant allele fractions tumor tissue and cfDNAs

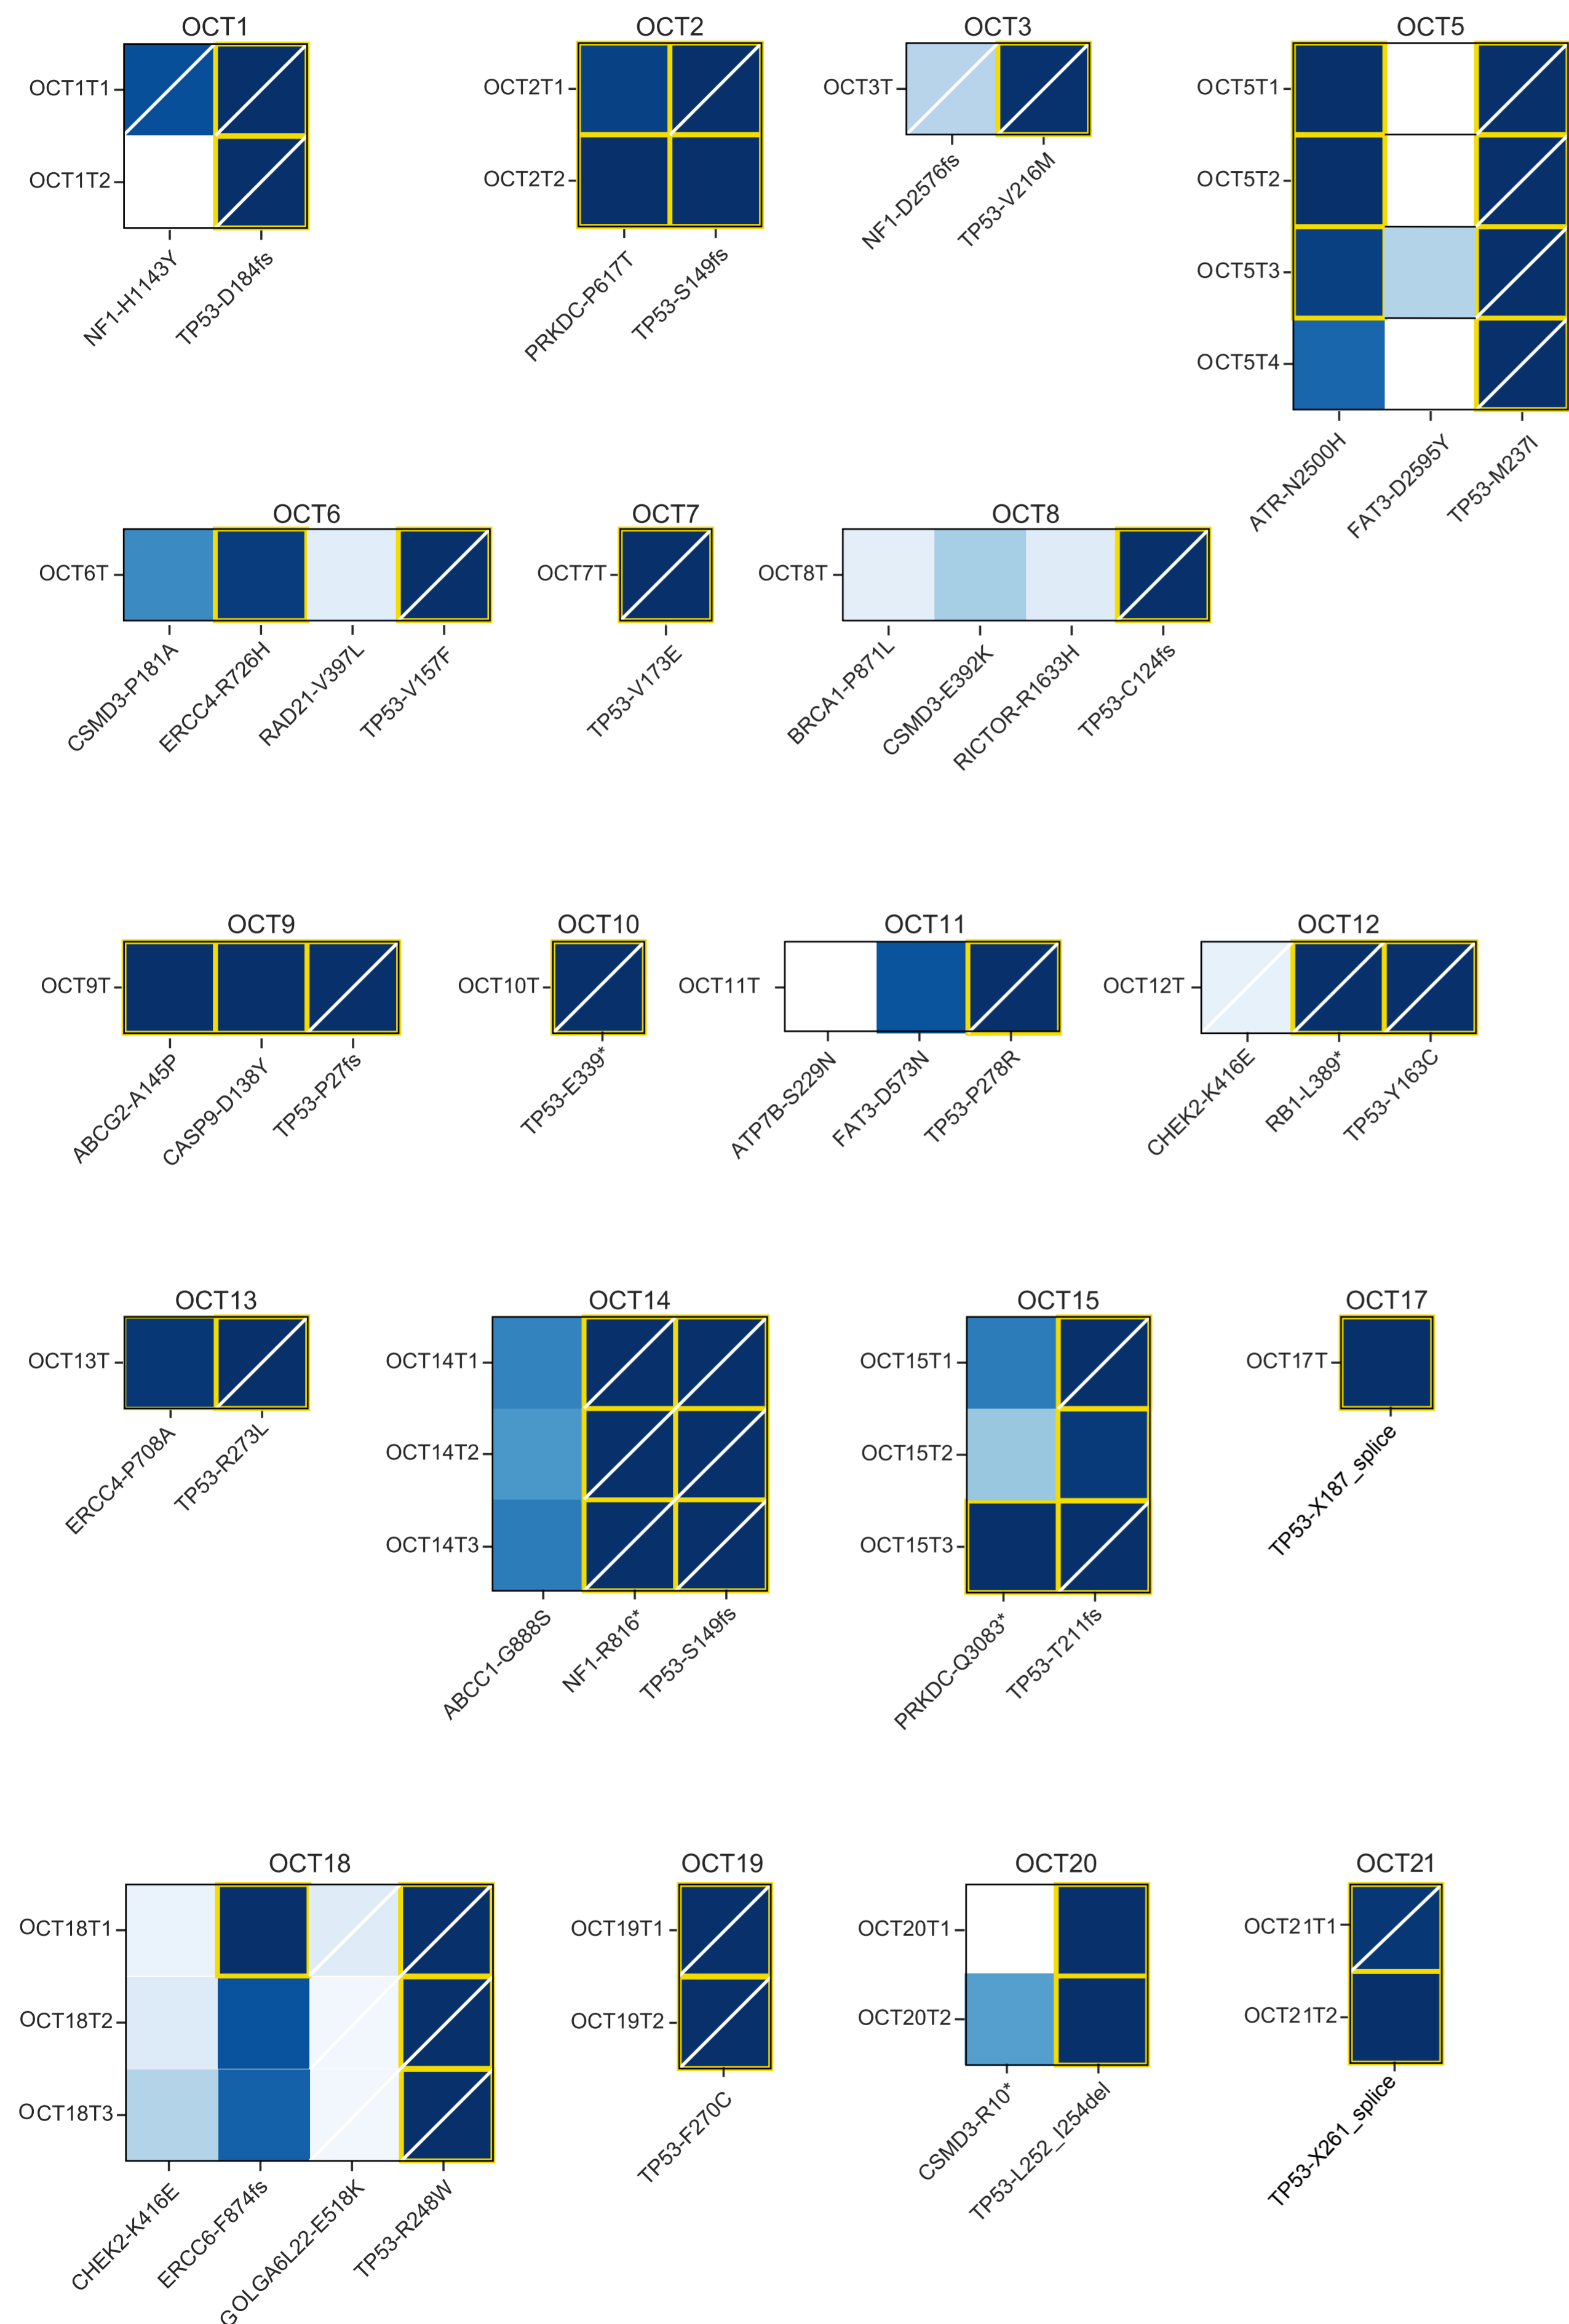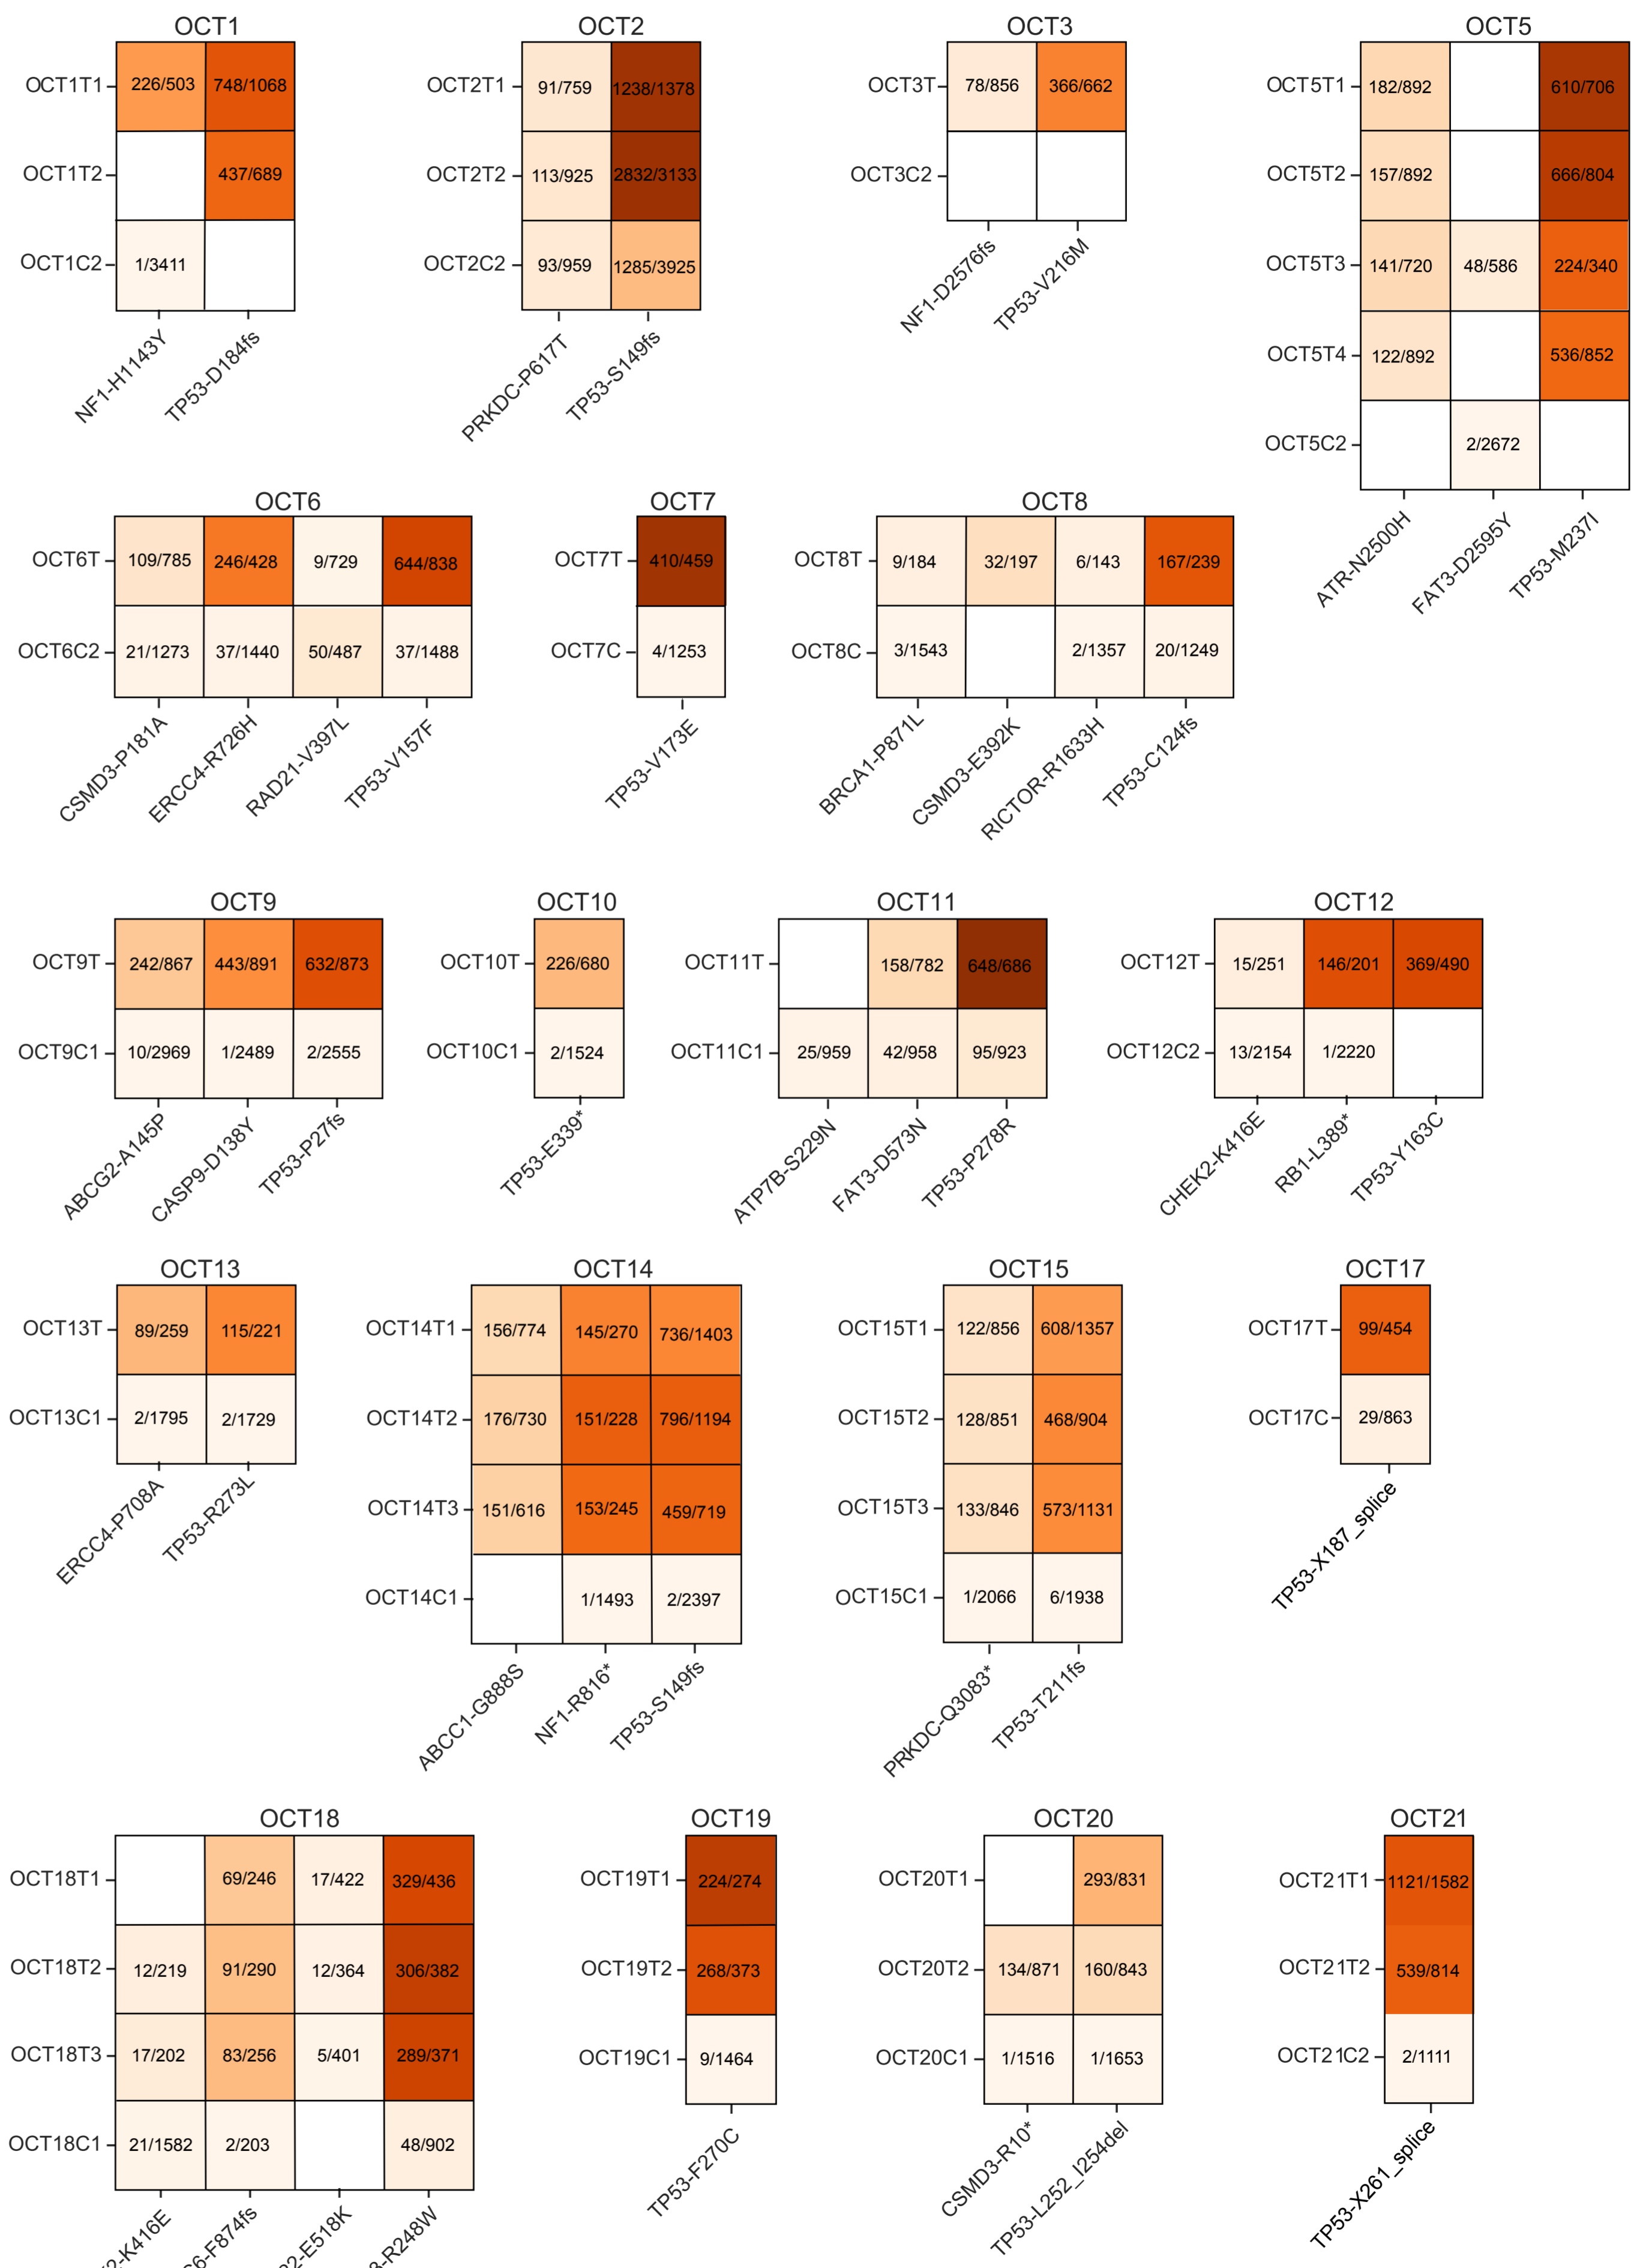

Cancer Cell Fraction

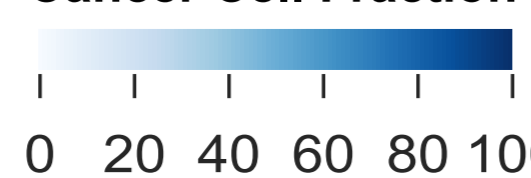

Loss of Heterozygosity

Clonal Mutation

Variant Allele Fraction

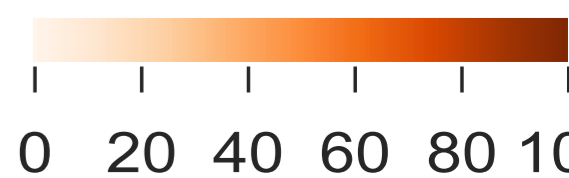

Supplement: NIHMS897787-supplement-2.pdf [file NIHMS897787-supplement-2.pdf]
