# Supplementary material
Source: PubMed Central journal article supplement (PMC5728372)
Supplement: NIHMS897787-supplement-5.pdf [file NIHMS897787-supplement-5.pdf]

# Supplementary Figure S4

L031

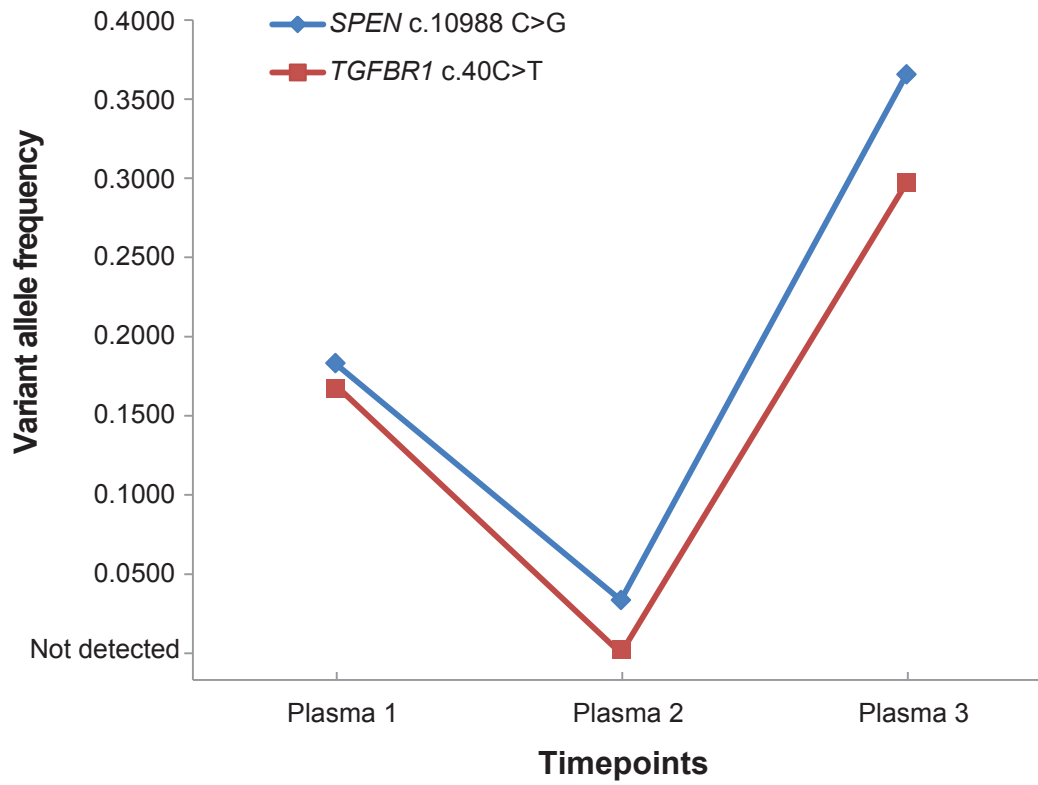

|                         | Plasma 1                 | Plasma 2 | Plasma 3 |
|-------------------------|--------------------------|----------|----------|
|                         | Variant allele frequency |          |          |
| <i>SPEN</i> c.10988 C>G | 0.1831                   | 0.0335   | 0.3655   |
| <i>TGFBR1</i> c.40C>T   | 0.1694                   | 0.0000   | 0.2969   |

|            |          |
|------------|----------|
| Mean depth | 138557 X |
|------------|----------|
