# Supplementary material
Source: PubMed Central journal article supplement (PMC5728372)
Supplement: NIHMS897787-supplement-6.pdf [file NIHMS897787-supplement-6.pdf]

**Supplementary Table S1:** List of 143 genes included in the targeted capture massively parallel sequencing assay.

| Gene symbol | Gene symbol | Gene symbol |
|-------------|-------------|-------------|
| ABCB1       | ERCC4       | PRKDC       |
| ABCC1       | ERCC5       | PTEN        |
| ABCC2       | ERCC6       | RAD21       |
| ABCC3       | ERCC8       | RAD23A      |
| ABCC5       | FADD        | RAD23B      |
| ABCG2       | FAF1        | RAD50       |
| ABL1        | FAS         | RAD51       |
| AKT1        | FAT3        | RAD51B      |
| APAF1       | FEN1        | RAD51C      |
| APEX1       | GABRA6      | RAD51D      |
| APEX2       | GADD45A     | RAD52       |
| ATM         | GANC        | RAD54L      |
| ATP7B       | GATM        | RB1         |
| ATR         | GEN1        | RBBP8       |
| ATXN3       | GOLGA6L1    | RICTOR      |
| AURKA       | HMGB1       | RPA1        |
| BAX         | LIG1        | RPA3        |
| BCL2        | LIG4        | RPS6KA5     |
| BCL2L1      | LRRK1       | RPTOR       |
| BLM         | MAP2K1      | RUVBL1      |
| BRCA1*      | MAP3K1      | RUVBL2      |
| BRCA2*      | MAPK1       | SHFM1       |
| BRIP1       | MAPK3       | SIRT1       |
| CASP3       | MAPK8       | SLC31A1     |
| CASP7       | MBD4        | SMUG1       |
| CASP8       | MDM2        | SNAP23      |
| CASP9       | MLH1        | SQRDL       |
| CCNG1       | MMS19       | SSRP1       |
| CCNH        | MPG         | SUPT16H     |
| CDC25C      | MRE11A      | TBP         |
| CDK1        | MSH2        | TOP3A       |
| CDK12       | MTOR        | TOP3B       |
| CDK7        | MUS81       | TP53        |
| CDKN1A      | MVP         | TP53BP1     |
| CFLAR       | NBN         | TP73        |
| CHEK1       | NF1         | UBTF        |
| CHEK2       | NFKB1       | UNG         |
| CSMD3       | NTHL1       | XAB2        |
| DCLRE1C     | OGG1        | XIAP        |
| DDB1        | PARP1       | XPA         |
| DDB2        | PARP2       | XPC         |
| DMC1        | PAXIP1      | XRCC1       |
| DUSP1       | PDK1        | XRCC2       |
| EME1        | PIK3CA      | XRCC3       |
| EME2        | PNKP        | XRCC4       |
| ERCC1       | POLD1       | XRCC5       |
| ERCC2       | POLH        | XRCC6       |
| ERCC3       | POLL        |             |

\*baits encompassed all exons and introns of BRCA1 and BRCA2
