# Supplementary material
Source: PubMed Central journal article supplement (PMC5728372)
Supplement: NIHMS897787-supplement-8.pdf [file NIHMS897787-supplement-8.pdf]

**Supplementary Table S3.** Putative BRCA1/2 reversion mutations identified in cDNA of ovarian and breast cancer patients using targeted massively parallel sequencing and results of amplicon re-sequencing of putative BRCA2 reversion mutations and other somatic mutations in cDNA and tumor tissue of metastatic breast cancers.

**Putative BRCA1/2 reversion mutations identified using a custom targeted massively parallel sequencing panel.**

| Cancer type | Sample ID | GERMLINE                                                                                             |                                       | Chrom | Position | Reference allele                  | Alternate allele | Mutation type               | Coverage | Count | Mutant allele fraction | cDNA change                                   | Wildtype protein length (AA) | Germline mutation protein length (AA) | Reversion mutation protein length (AA) | 3' 5 bases microhomology (red) | 5' 9 bases microhomology (red) | Exon |
|-------------|-----------|------------------------------------------------------------------------------------------------------|---------------------------------------|-------|----------|-----------------------------------|------------------|-----------------------------|----------|-------|------------------------|-----------------------------------------------|------------------------------|---------------------------------------|----------------------------------------|--------------------------------|--------------------------------|------|
|             |           | BRCA1 germline mutation protein length (AA)<br>(BRCA1 ENST00000301654.3<br>(BRCA2 ENST00000301652.3) | BRCA2 germline alternative annotation |       |          |                                   |                  |                             |          |       |                        |                                               |                              |                                       |                                        |                                |                                |      |
| Ovarian     | OCT15C    | BRCA1 c.68_69delAG                                                                                   | BRCA1 187delAG/185delAG               | 17    | 41207768 | TG                                | T                | frameshift_variant          | 2554     | 1     | 0.0392%                | c.108delC                                     | 1863                         | 38                                    | 1862                                   | CAGAC                          | CTTTGT                         | 3    |
| Ovarian     | OCT15C    | BRCA1 c.68_69delAG                                                                                   | BRCA1 187delAG/185delAG               | 17    | 41207763 | CT                                | C                | frameshift_variant          | 2114     | 1     | 0.0473%                | c.113delAA                                    | 1863                         | 38                                    | 1862                                   | TTGTC                          | TCAAC                          | 3    |
| Ovarian     | OCT15C    | BRCA1 c.68_69delAG                                                                                   | BRCA1 187delAG/185delAG               | 17    | 41207791 | TC                                | T                | frameshift_variant          | 2046     | 1     | 0.0489%                | c.55delG                                      | 1863                         | 38                                    | 1862                                   | CAGAC                          | TCAACT                         | 3    |
| Ovarian     | OCT10C    | BRCA1 c.3908dupT                                                                                     | BRCA1 4027insT                        | 17    | 41243566 | TC                                | T                | frameshift_variant          | 1214     | 1     | 0.0824%                | c.3951delG                                    | 1863                         | 1328                                  | 1863                                   | AAGAA                          | ACCAAT                         | 10   |
| Ovarian     | OCT10C    | BRCA1 c.3908dupT                                                                                     | BRCA1 4027insT                        | 17    | 41243621 | AT                                | A                | frameshift_variant          | 1177     | 1     | 0.0850%                | c.3926delA                                    | 1863                         | 1328                                  | 1863                                   | TTGCA                          | TTTTGA                         | 10   |
| Ovarian     | OCT10C    | BRCA1 c.4124delC                                                                                     | BRCA1 4843delC                        | 17    | 41221463 | TGA                               | T                | frameshift_variant          | 2184     | 1     | 0.0143%                | c.4166_4181delTC                              | 1863                         | 1599                                  | 1862                                   | AGATGG                         | SAAGTT                         | 15   |
| Breast      | L031_P2   | BRCA2 c.4075delA                                                                                     | NA                                    | 13    | 32899297 | TTCTAAATCTTG                      | T                | disruptive_inframe_deletion | 1761     | 1     | 0.0598%                | c.402_413delTCTAAATCTTG                       | 3418                         | 150                                   | 3414                                   | TCTTA                          | TCCACT                         | 4    |
| Breast      | 1109_P1   | BRCA2 c.755_758delACAG                                                                               | NA                                    | 13    | 32905103 | TGATAGATTATCGCTTCTGTGACA          | T                | disruptive_inframe_deletion | 1431     | 2     | 0.1398%                | c.729_754delGATAGATTATCGCTTCTGTGACA           | 3418                         | 274                                   | 3410                                   | GACAG                          | AAAAAT                         | 9    |
| Breast      | 1109_P1   | BRCA2 c.755_758delACAG                                                                               | NA                                    | 13    | 32905114 | TGCGTCTGTGACAGA                   | T                | inframe_deletion            | 1383     | 2     | 0.1448%                | c.740_756delCGCTTCTGTGACAGA                   | 3418                         | 274                                   | 3403                                   | CAGTG                          | ATTAT                          | 9    |
| Breast      | 1109_P1   | BRCA2 c.755_758delACAG                                                                               | NA                                    | 13    | 32905115 | CGCTTCTGTGACAGAGTGAAAACAAATCAAAGA | C                | disruptive_inframe_deletion | 1385     | 1     | 0.0723%                | c.741_756delCGCTTCTGTGACAGAGTGAAAACAAATCAAAGA | 3418                         | 274                                   | 3403                                   | SAGCG                          | TTTATC                         | 9    |
| Breast      | 1109_P1   | BRCA2 c.755_758delACAG                                                                               | NA                                    | 13    | 32905137 | AAC                               | A                | frameshift_variant          | 1357     | 1     | 0.0737%                | c.767_768delCA                                | 3418                         | 274                                   | 3416                                   | ACAAA                          | GTGAAA                         | 9    |
| Breast      | 1109_P1   | BRCA2 c.755_758delACAG                                                                               | NA                                    | 13    | 32905140 | ACAAT                             | A                | frameshift_variant          | 1369     | 2     | 0.1461%                | c.771_775delTCAAA                             | 3418                         | 274                                   | 3415                                   | CAAGG                          | AAAACA                         | 9    |
| Breast      | 1109_P1   | BRCA2 c.755_758delACAG                                                                               | NA                                    | 13    | 32905146 | CAA                               | C                | frameshift_variant          | 1320     | 3     | 0.2273%                | c.774_775delAA                                | 3418                         | 274                                   | 3416                                   | AGAGA                          | CAATTC                         | 9    |
| Breast      | 1109_P2   | BRCA2 c.755_758delACAG                                                                               | NA                                    | 13    | 32905163 | TGATAGATTATCGCTTCTGTGACA          | T                | disruptive_inframe_deletion | 1814     | 1     | 0.0551%                | c.729_754delGATAGATTATCGCTTCTGTGACA           | 3418                         | 274                                   | 3410                                   | GACAG                          | AAAAAT                         | 9    |
| Breast      | 1109_P2   | BRCA2 c.755_758delACAG                                                                               | NA                                    | 13    | 32905104 | GAT                               | G                | frameshift_variant          | 1822     | 1     | 0.0549%                | c.732_733delAT                                | 3418                         | 274                                   | 3416                                   | AGATT                          | AAATG                          | 9    |
| Breast      | 1109_P2   | BRCA2 c.755_758delACAG                                                                               | NA                                    | 13    | 32905137 | AAC                               | A                | frameshift_variant          | 1778     | 1     | 0.0562%                | c.767_768delCA                                | 3418                         | 274                                   | 3416                                   | ACAAA                          | GTGAAA                         | 9    |
| Breast      | 1109_P2   | BRCA2 c.755_758delACAG                                                                               | NA                                    | 13    | 32904629 | AATTCATT                          | A                | frameshift_variant          | 2122     | 2     | 0.0943%                | c.814_823delAATTCATT                          | 3418                         | 274                                   | 3414                                   | AAGT                           | CAGGGA                         | 10   |
| Breast      | 1109_P2   | BRCA2 c.755_758delACAG                                                                               | NA                                    | 13    | 32904631 | TTCAATTA                          | T                | frameshift_variant          | 2144     | 2     | 0.0933%                | c.816_825delTTCAATTA                          | 3418                         | 274                                   | 3414                                   | AGTA                           | GGGAAT                         | 10   |

**Putative BRCA2 reversion mutations in serial plasma samples of case L031 (amplicon-resequencing)**

|            | RUN 1                                              |                                                         | RUN 2                                            |                                                          |
|------------|----------------------------------------------------|---------------------------------------------------------|--------------------------------------------------|----------------------------------------------------------|
|            | BRCA2 reversion 1<br>c.403_413delTCTAAATCTT<br>TTG | BRCA2 reversion 2<br>c.389_406delTTTCTGCTCCACT<br>TCTAA | BRCA2 reversion 1<br>c.403_413delTCTAAATCTT<br>G | BRCA2 reversion 2<br>c.389_406delTTTCTGCTCCACTTCTAA<br>G |
|            | Variant Allele Frequency                           |                                                         |                                                  |                                                          |
| Plasma 1   | 0.003682                                           | 0                                                       | 0.002080                                         | 0.000067                                                 |
| Plasma 2   | 0.000604                                           | 0                                                       | 0.000862                                         | 0                                                        |
| Plasma 3   | 0.013141                                           | 0.004984                                                | 0.005768                                         | 0.003093                                                 |
| Mean Depth |                                                    |                                                         |                                                  |                                                          |
|            | RUN1<br>9308 X                                     | RUN2<br>564259 X                                        |                                                  |                                                          |

**Putative BRCA2 reversion mutations in plasma sample of case 1109 (amplicon re-sequencing)**

| Putative BRCA2 reversion mutations    | RUN 1                    | RUN 2                    |
|---------------------------------------|--------------------------|--------------------------|
|                                       | Variant Allele Frequency | Variant Allele Frequency |
| c.728_738delATGATAGATT                | 0.001137                 | 0.000082                 |
| c.728_738delATGATAGATTATCGCTTCTGTGACA | 0.000296                 | 0.000211                 |
| c.731_732delAT                        | 0.001147                 | 0.000296                 |
| c.735insT                             | 0.000237                 | 0.000739                 |
| c.728_738delATCGCTTCTGTGACAGAGTGAA    | 0.001609                 | 0.000063                 |
| c.763insC                             | 0.000534                 | -                        |
| c.764_765delAC                        | 0.001084                 | 0.001108                 |
| c.766insC                             | 0.000531                 | -                        |
| c.773_774delAA                        | 0.000547                 | -                        |
| Mean Depth                            |                          |                          |
|                                       | RUN1<br>3651 X           | RUN2<br>147132 X         |

**Variant allele fractions of somatic mutations in the pre-treatment tumor and post-treatment plasma sample from patient 1109 (amplicon re-sequencing)**

|                  | Plasma (post-treatment)  | Tumor (pre-treatment) |
|------------------|--------------------------|-----------------------|
|                  | Variant Allele Frequency |                       |
| FAT3 c.13447 A>T | 0.110357                 | 0.160037              |
| ERCC4 c.749 A>G  | 0.382705                 | 0.518661              |
| RDWBC c.2321 A>G | 0.328663                 | 0.555681              |
| Mean Depth       |                          |                       |
|                  | 219132 X                 |                       |

**Percentages of cDNA and variant allele fractions of somatic mutations and reversion mutations in cDNA in the samples from the four ovarian cancer patients harboring putative BRCA1 reversion mutations.**

| Tumor sample | Fraction cDNA in cDNA (%) | Variant allele fractions in cDNA |        | Putative BRCA1 reversion mutations variant allele fractions in cDNA (Reversion mut. %) |
|--------------|---------------------------|----------------------------------|--------|----------------------------------------------------------------------------------------|
|              |                           | Mutation type (gene - mutation)  | (%)    |                                                                                        |
| OCT1         | NA                        | NF111145Y                        | 0.0263 | Rev1 - 0.0314                                                                          |
| OCT5         | NA                        | FAT3-D2598Y                      | 0.0749 | Rev1 - 0.0362                                                                          |
| OCT10        | 0.26                      | TP93 E339*                       | 0.1312 | Rev1 - 0.0850                                                                          |
| OCT15        | 0.31                      | PRKDC-Q3083*                     | 0.0484 | Rev1 - 0.0824                                                                          |
|              |                           | TP53-T211fs                      | 0.3096 | Rev2 - 0.0473                                                                          |
