# Supplementary material
Source: PubMed Central journal article supplement (PMC5728372)

# Supplementary Figure S3

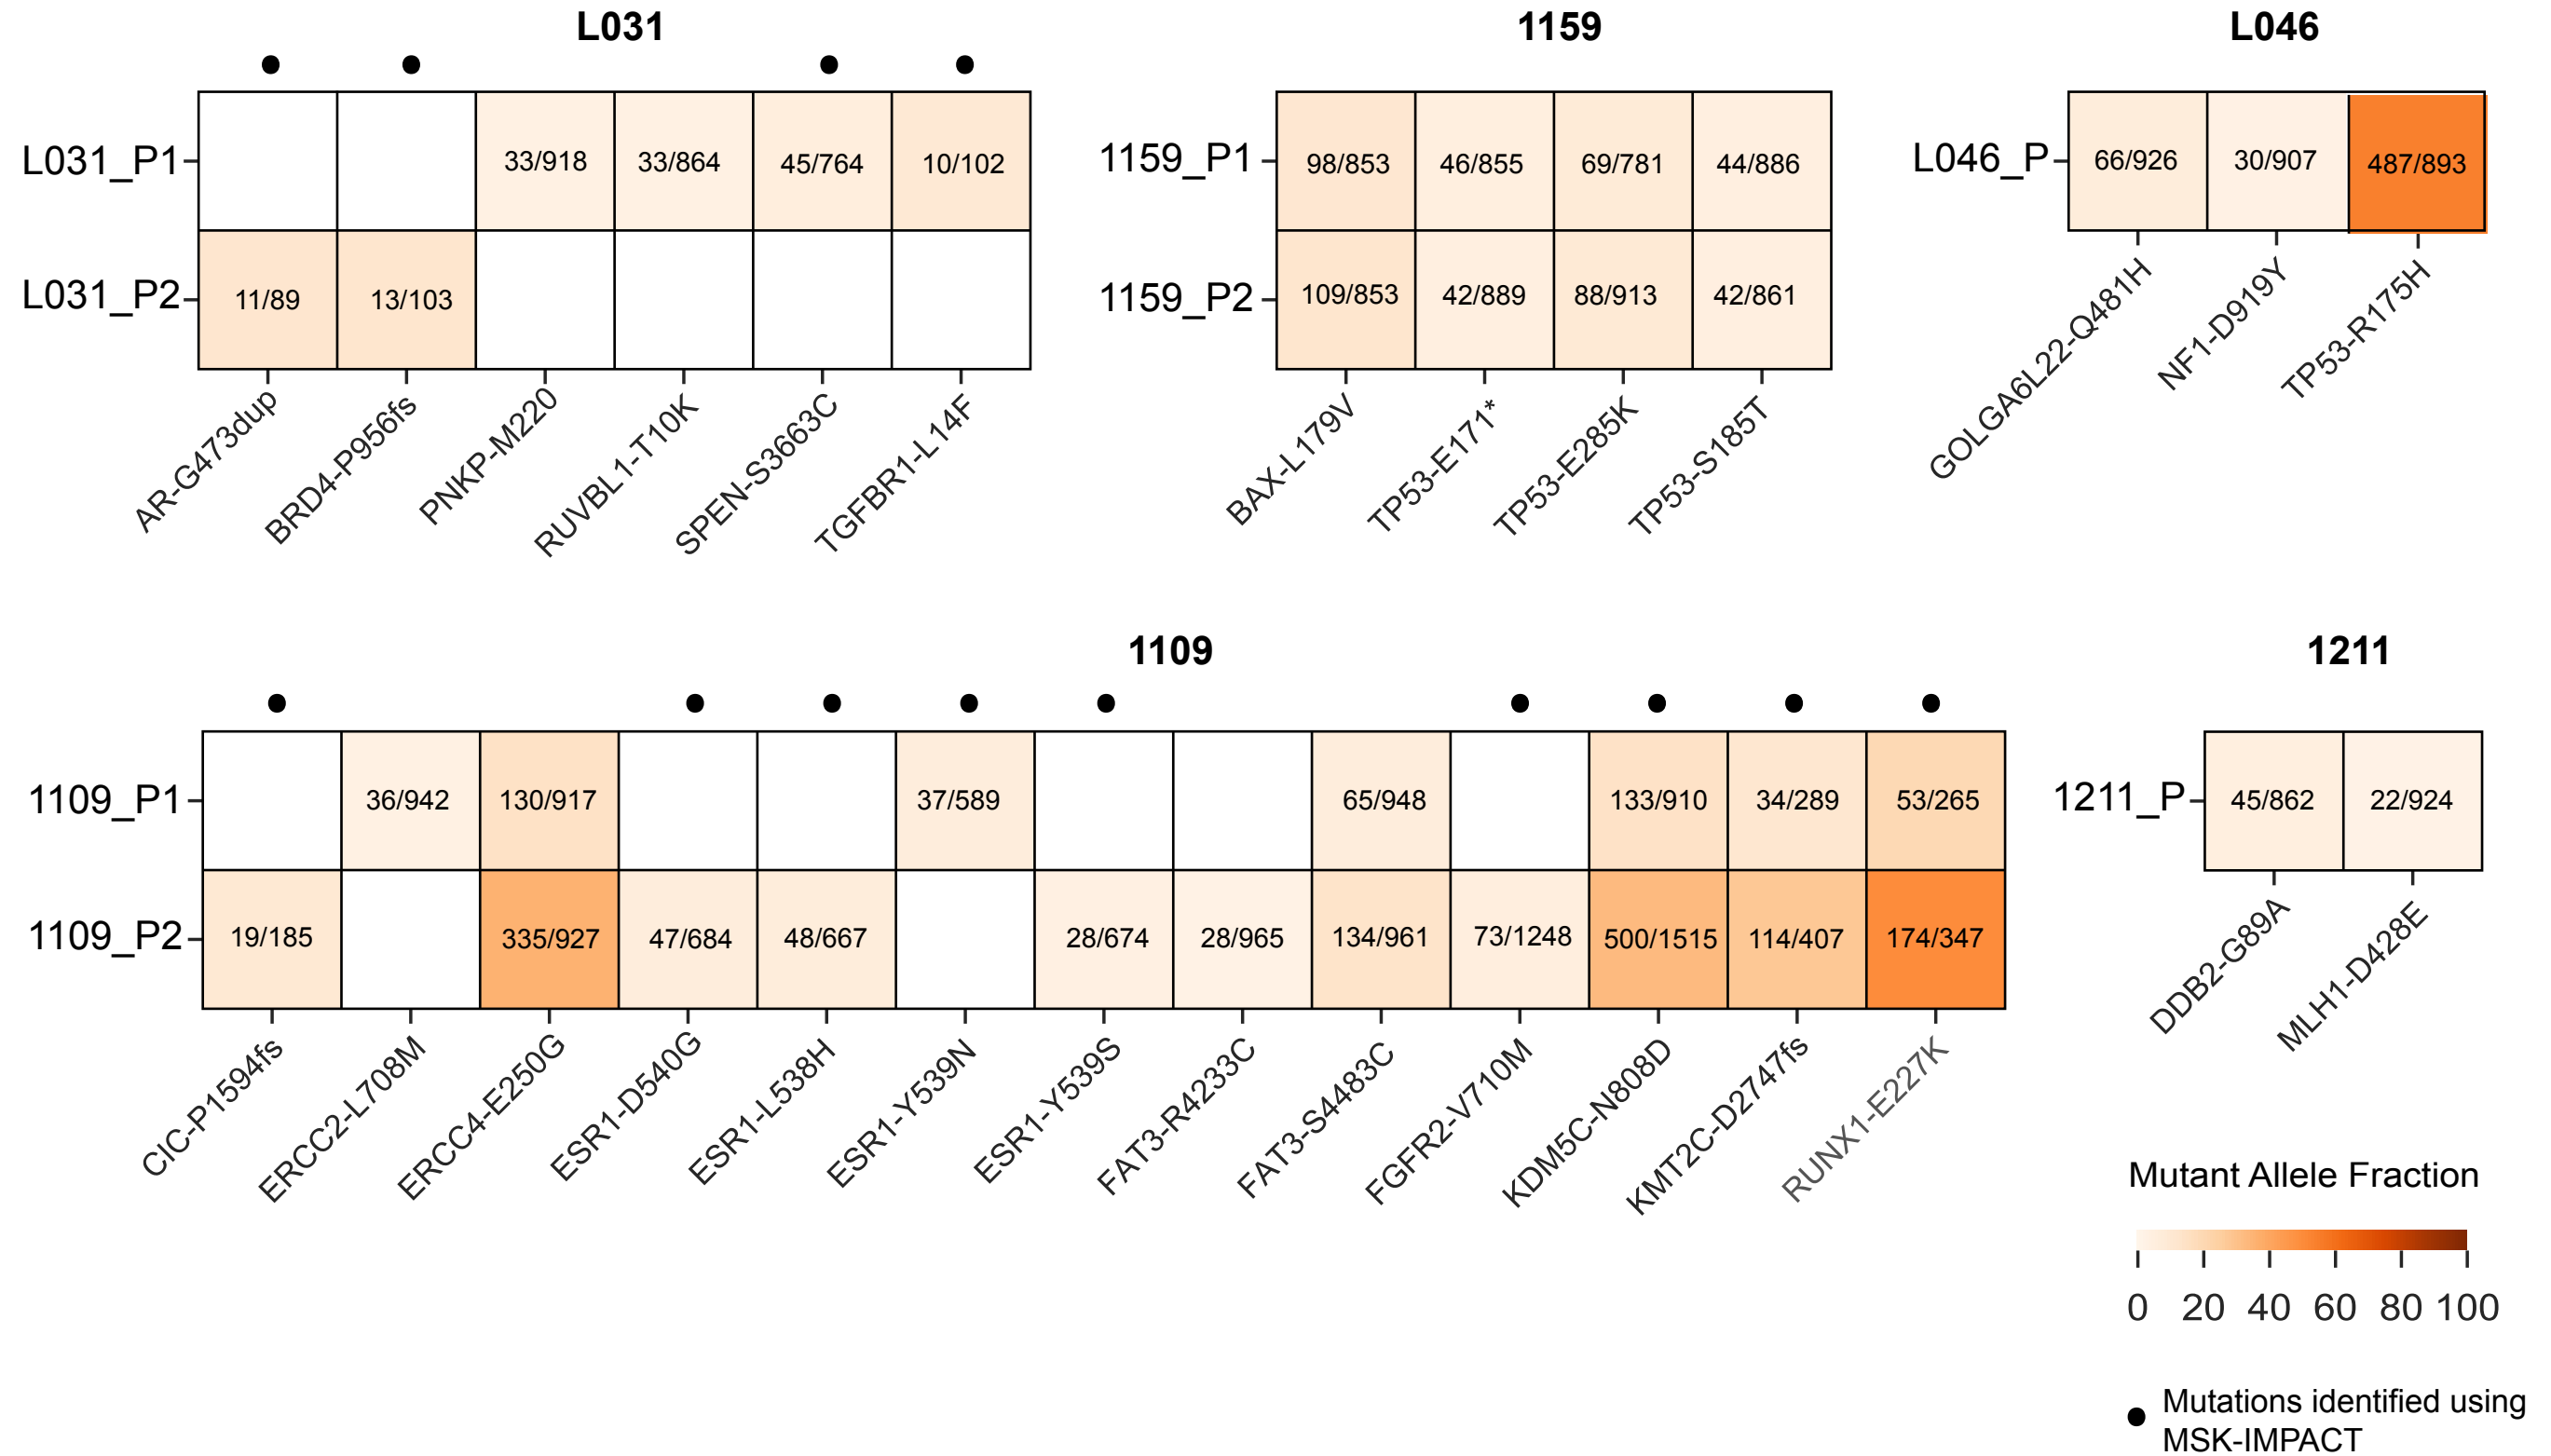

Supplement: NIHMS897787-supplement-4.pdf [file NIHMS897787-supplement-4.pdf]
